# Supplementary material for: An inclusive Research Education Community (iREC) Model to Facilitate Undergraduate Science Education Reform
Source: PubMed Central journal article supplement (PMC11649309; doi:10.3389/feduc.2024.1442318), 2024-08-20
Supplement: NIHMS2021733-supplement-Supplementary_Tables_S1_-_S2.pdf [file NIHMS2021733-supplement-Supplementary_Tables_S1_-_S2.pdf]

Table SI. Questions asked to the small stakeholder group during two pathway modeling feedback sessions.

| Purpose                          | Question                                                                                                                                               |
|----------------------------------|--------------------------------------------------------------------------------------------------------------------------------------------------------|
| <i>Priming</i>                   | 1. What do you see as the main value or contribution of the SEA faculty community for instructors?                                                     |
| <i>Priming</i>                   | 2. How does this depiction (pathway model) of the SEA faculty experience resonate with your own observations?                                          |
| <i>Model annotation</i>          | 3. Is anything missing from the model?                                                                                                                 |
| <i>Model annotation</i>          | 4. What do you think are the most important activities in the model?                                                                                   |
| <i>Model annotation</i>          | 5. What do you think are the most important outcomes in the model?                                                                                     |
| <i>Model annotation</i>          | 6. What do you think are the most important links or connections in the model?                                                                         |
| <i>Additional data gathering</i> | 7. Think about your SEA experience at your current institution. What is the most important thing someone should know about your institutional context? |
| <i>Additional data gathering</i> | 8. What are key elements of context that influence success or failure of the SEA faculty community?                                                    |
| <i>Additional data gathering</i> | 9. Is there anything that you haven't told us yet that would make the model better?                                                                    |
| <i>Additional data gathering</i> | 10. Do you have any other thoughts that you would like to share related to your experience with the SEA faculty community?                             |

Table S2. Task asked of the large stakeholder group during the Annual SEA meeting.

|                                                                                                                                                                                                                                                                                                   |
|---------------------------------------------------------------------------------------------------------------------------------------------------------------------------------------------------------------------------------------------------------------------------------------------------|
| <p>1. Take 2 minutes to introduce yourselves</p>                                                                                                                                                                                                                                                  |
| <p>2. Take 2 minutes to read through the pathway below. Look at the outcomes (boxes) and look at how one outcome is linked to the next.</p> 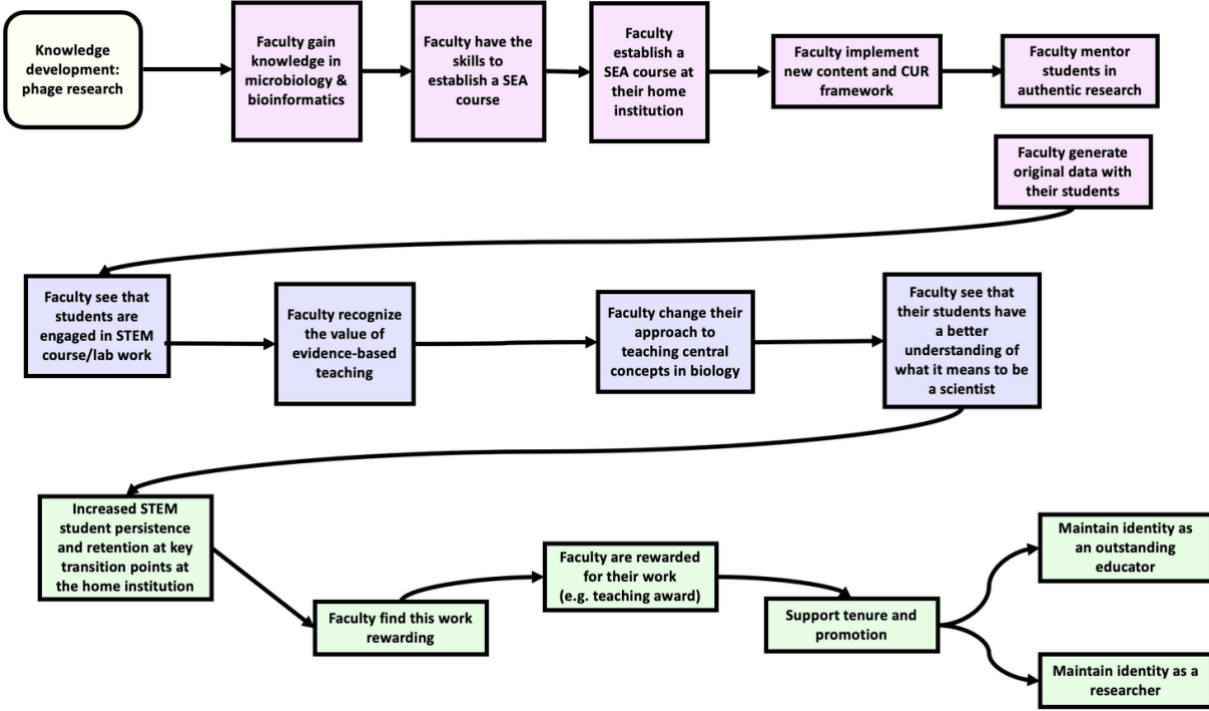                                                                   |
| <p>3. Then take ~ 15 minutes to discuss with your group, the discussion prompts below.</p> <p>a) Which outcomes in the model are reflective of your experience as a SEA faculty?</p> <p>b) Are there any outcomes that are aspirational for you or that you would like to experience more of?</p> |
| <p>4. When prompted, take 5 minutes to provide your reflection on the pathway in the space below. Please write 5-10 sentences reflecting on the SEA Faculty Community Model, focusing on the pathway above.</p>                                                                                   |
